# Supplementary material for: π-π Conjugation Enhances Oligostilbene’s Antioxidant Capacity: Evidence from α-Viniferin and Caraphenol A
Source: MDPI journal article supplement (doi:10.3390/molecules23030694), 2018-03-19

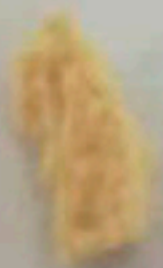

**$\alpha$ -Viniferin**

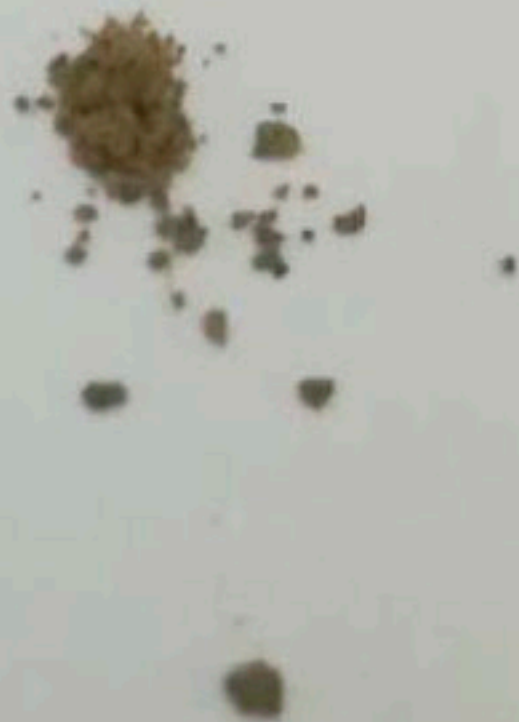

**Caraphenol A**

## CERTIFICATE OF ANALYSIS

**BBP No.:** BBP00225

**CAS No.:** 62218-13-7

**Chemical Name:**  $\alpha$ -Viniferin

**Molecular Formula:**  $C_{42}H_{30}O_9$

**Structure:**

**Purity:** 97%

**Appearance:** Powder

**Solvent:** Acetone, methanol

**Exact Weight:** 5.1 mg

**Storage:** Store in a dark place under the temperature of 0-4 °C

**Intended Use:** For laboratory use only

**Reference:** R. J. Pryce, et al., Phytochemistry, 1977, 16, 1452-1454

**Warm Notice:** When publishing, please cite as: chemical name was purchased from BioBioPha Co., Ltd. (Kunming, China)

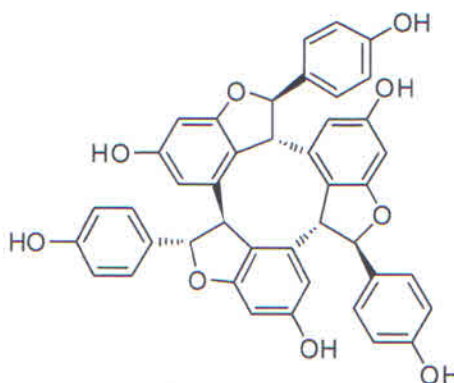

### Characterization Data Summary

| Analytical Test                         | Results                             |
|-----------------------------------------|-------------------------------------|
| Identification by $^1\text{H-NMR}$      | Consistent with the above structure |
| Purity tested by HPLC, $^1\text{H-NMR}$ | 97%                                 |

**Authorized Signature:**

**Date:**

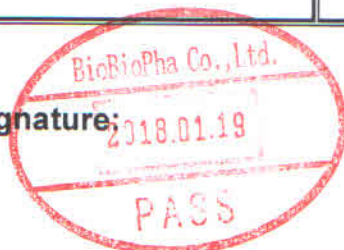

## PRODUCT QUALITY REPORT

Product Number: BBP00225

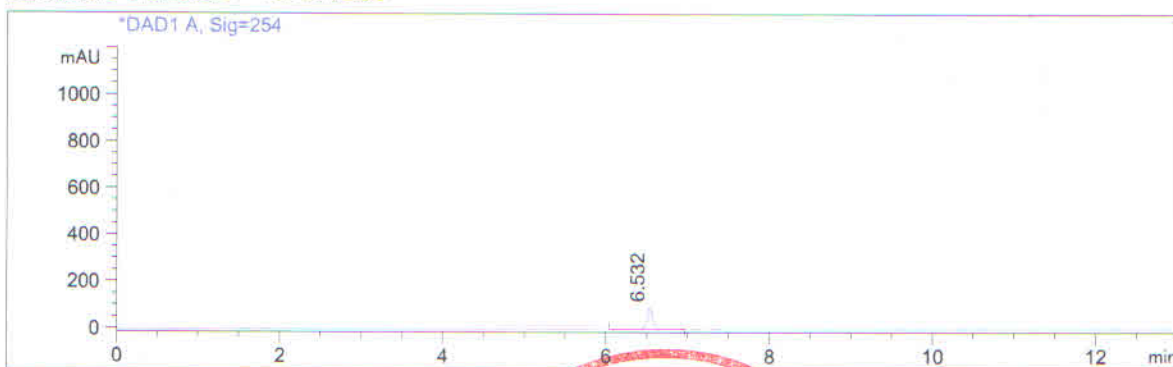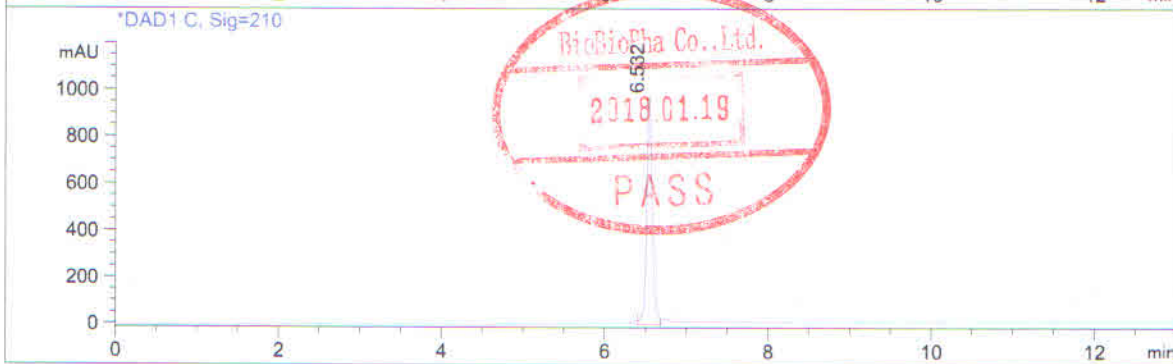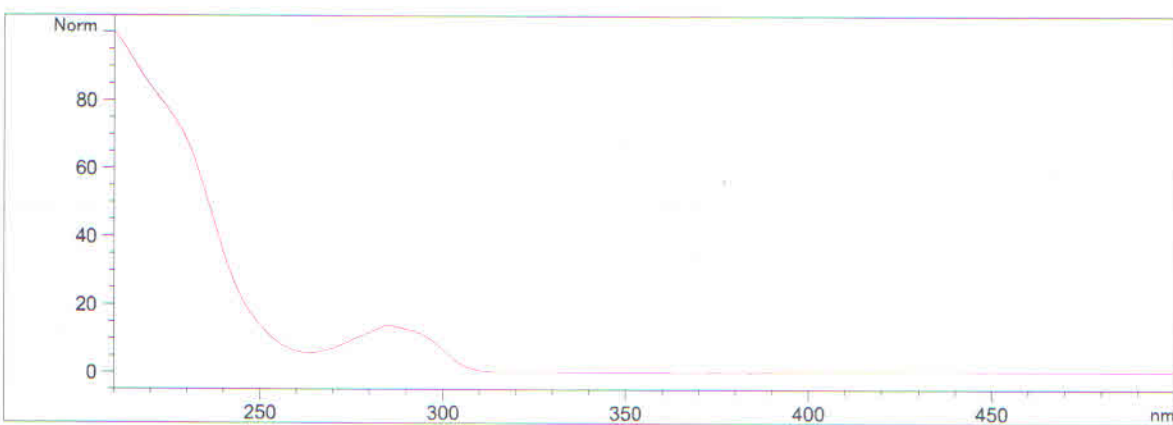

Agilent 1200 series HPLC system

Extend-C18 column (5  $\mu$ m, 4.6  $\times$  150 mm)

20%  $\rightarrow$  100% MeOH in H<sub>2</sub>O over 8.0 min followed by 100% MeOH to 13.0 min

1.0 ml/min, 25°C

Acetone- $d_6$ , 400 MHz

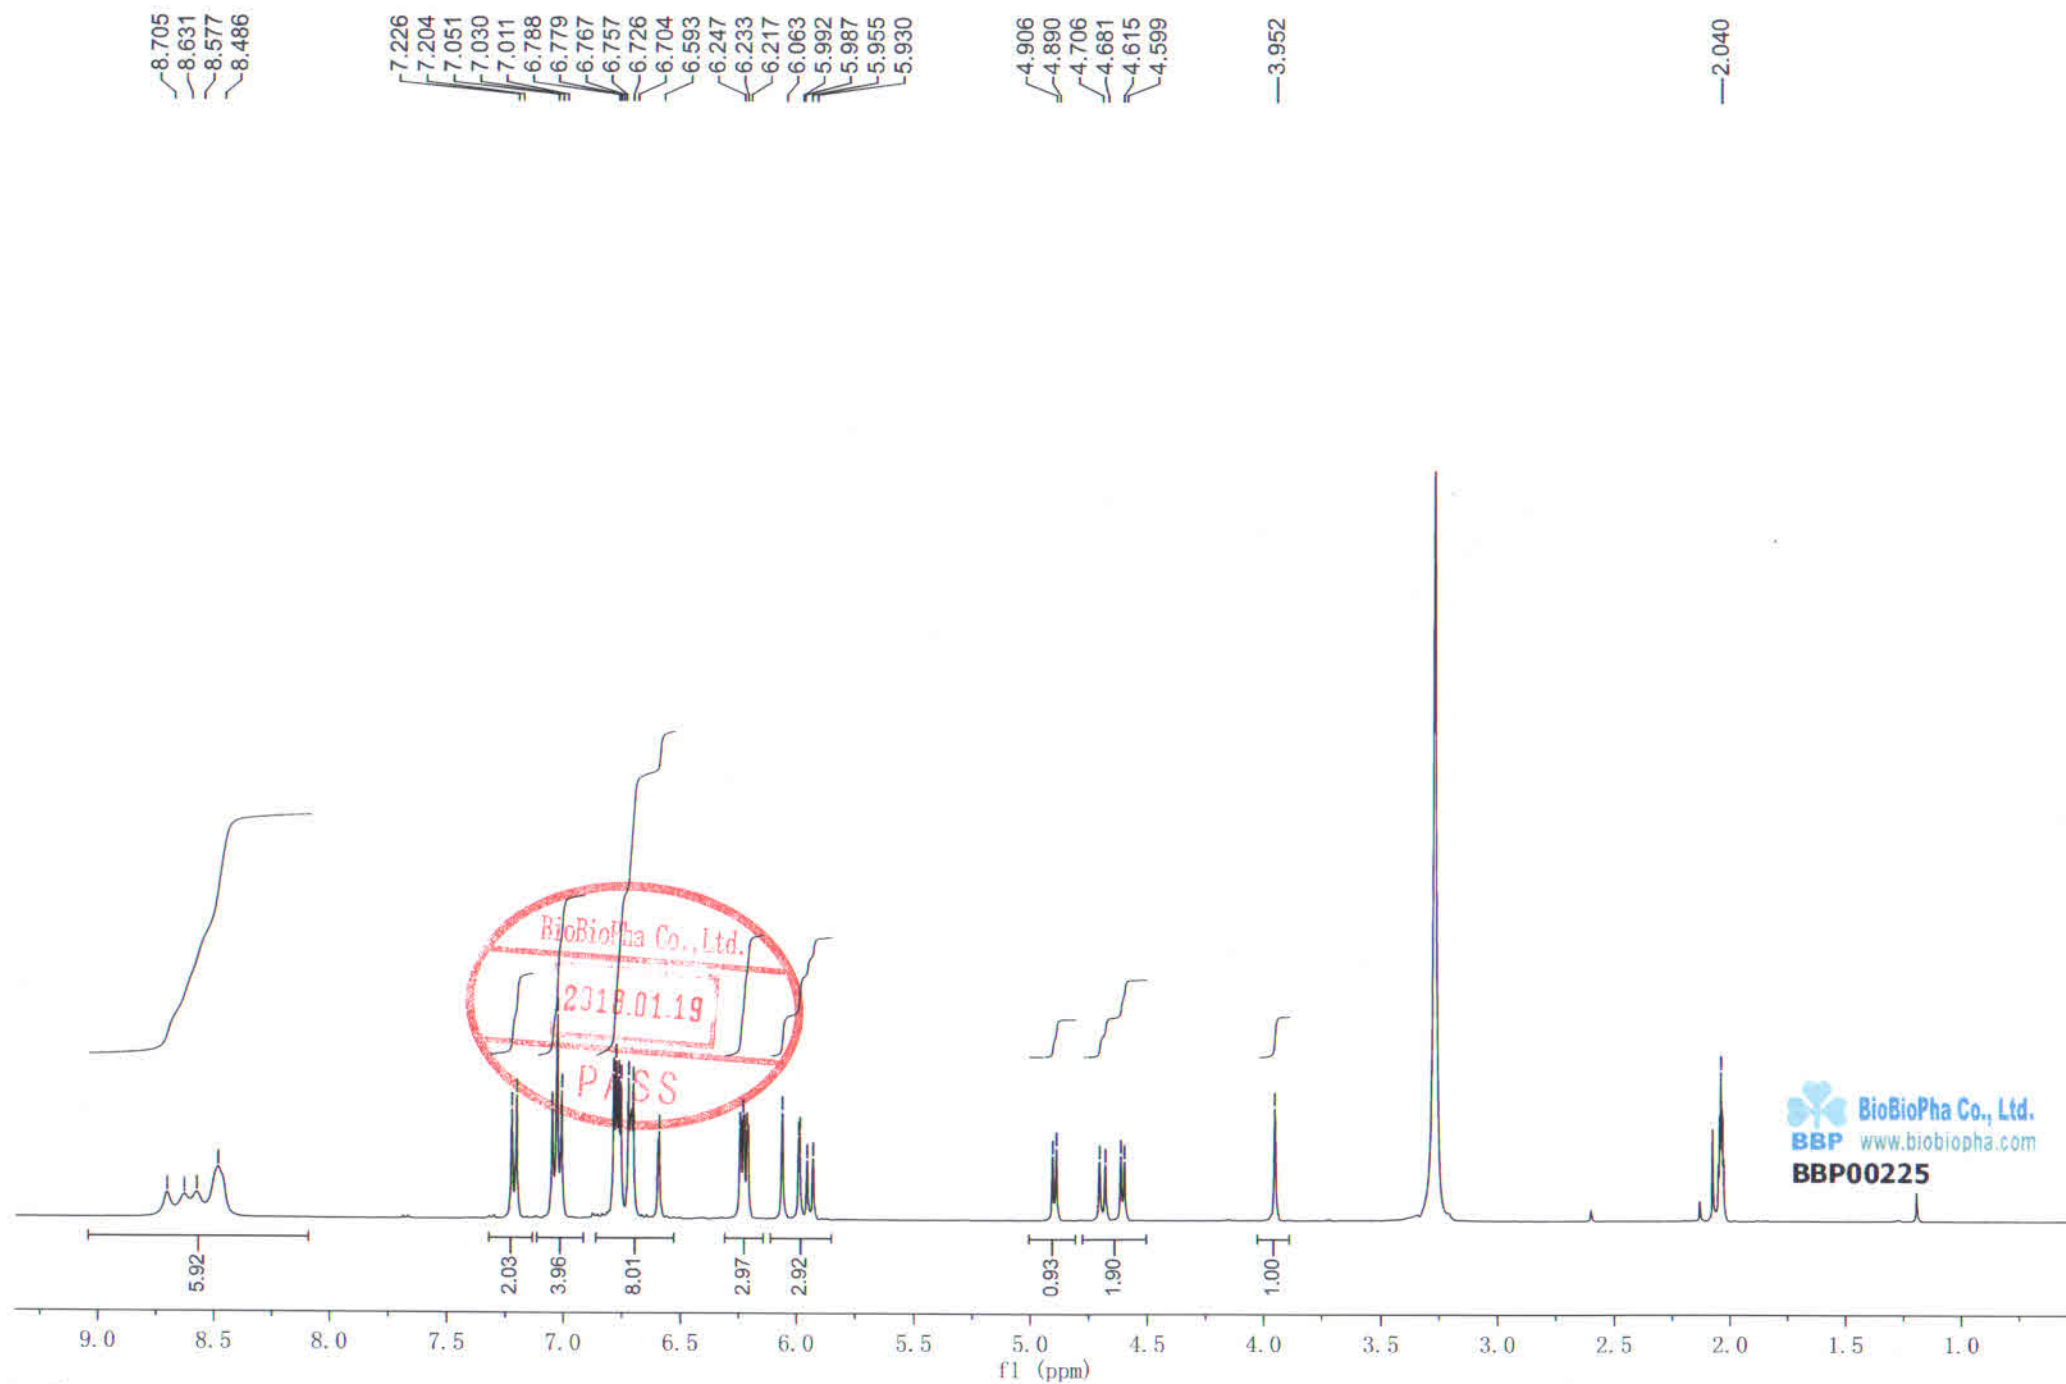

## CERTIFICATE OF ANALYSIS

**BBP No.:** BBP00255

**CAS No.:** 354553-35-8

**Chemical Name:** Caraphenol A

**Molecular Formula:** C<sub>42</sub>H<sub>28</sub>O<sub>9</sub>

**Structure:**

**Purity:** 97%

**Appearance:** Powder

**Solvent:** Acetone, methanol

**Exact Weight:** 5.1 mg

**Storage:** Store in a dark place under the temperature of 0-4 °C

**Intended Use:** For laboratory use only

**Reference:** H. F. Luo, et al., Tetrahedron, 2001, 57, 4849-4854

**Warm Notice:** When publishing, please cite as: **chemical name** was purchased from BioBioPha Co., Ltd. (Kunming, China)

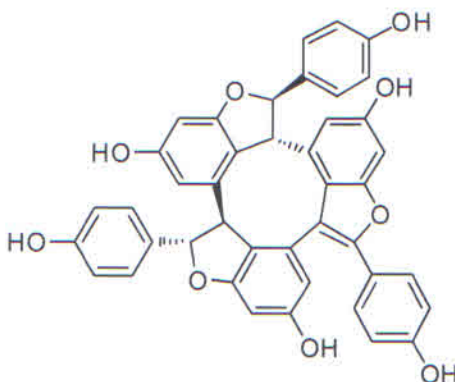

### Characterization Data Summary

| Analytical Test                           | Results                             |
|-------------------------------------------|-------------------------------------|
| Identification by <sup>1</sup> H-NMR      | Consistent with the above structure |
| Purity tested by HPLC, <sup>1</sup> H-NMR | 97%                                 |

**Authorized Signature:**

**Date:**

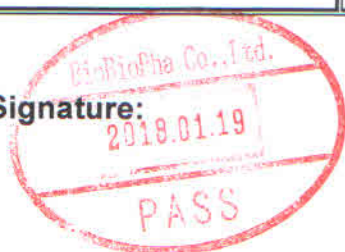

## PRODUCT QUALITY REPORT

Product Number: BBP00255

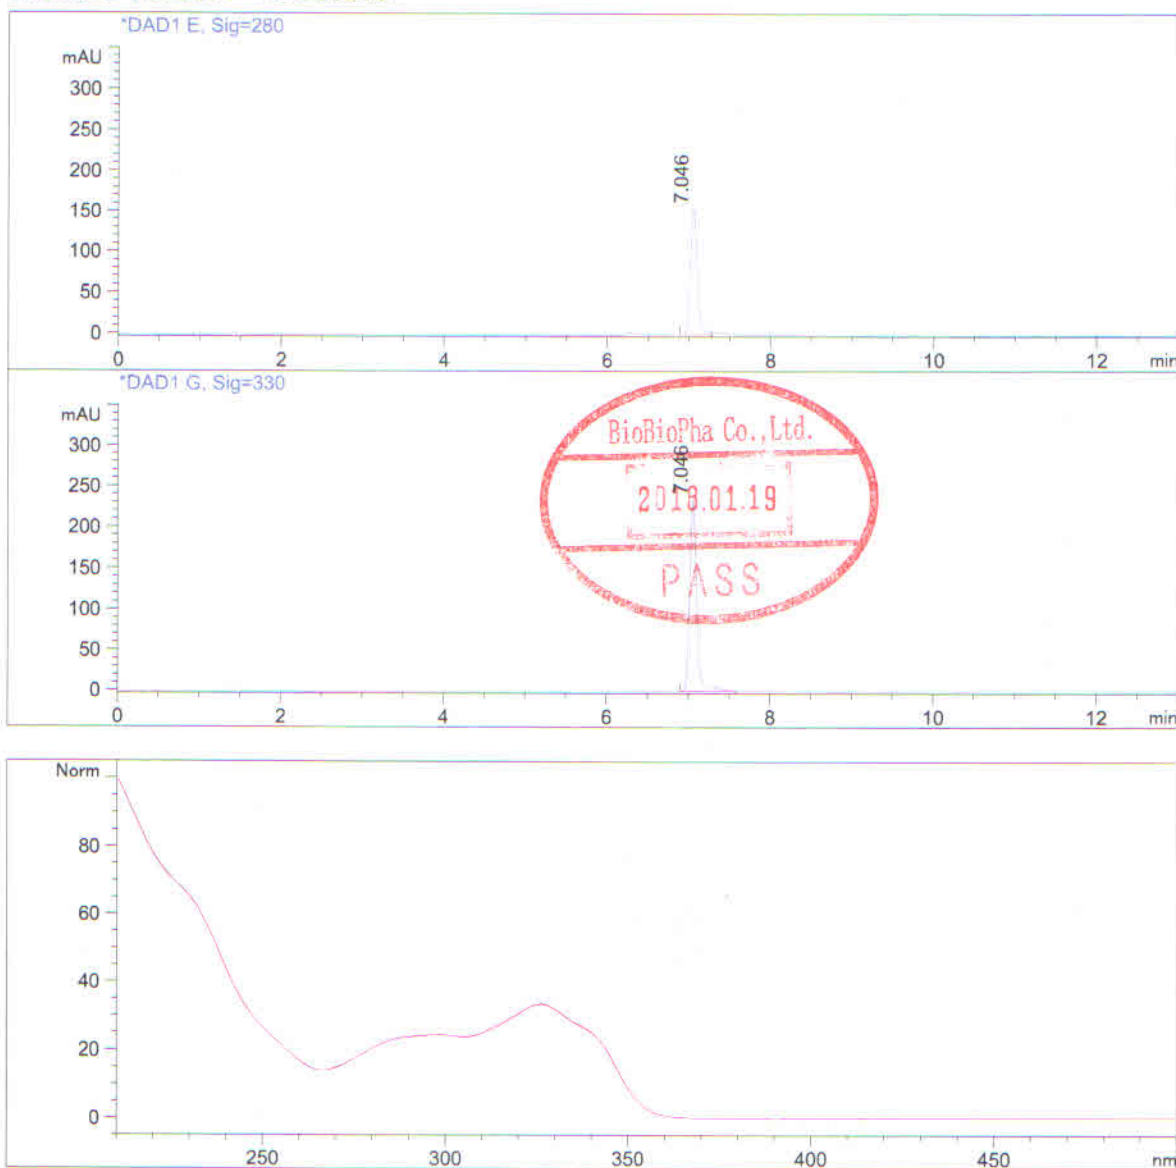

Agilent 1200 series HPLC system

Thermo Hypersil BDS C18 column (5  $\mu$ m, 4.6  $\times$  150 mm)

20%  $\rightarrow$  100% MeOH in H<sub>2</sub>O over 8.0 min followed by 100% MeOH to 13.0 min

1.0 ml/min, 25°C

Acetone- $d_6$ , 400 MHz

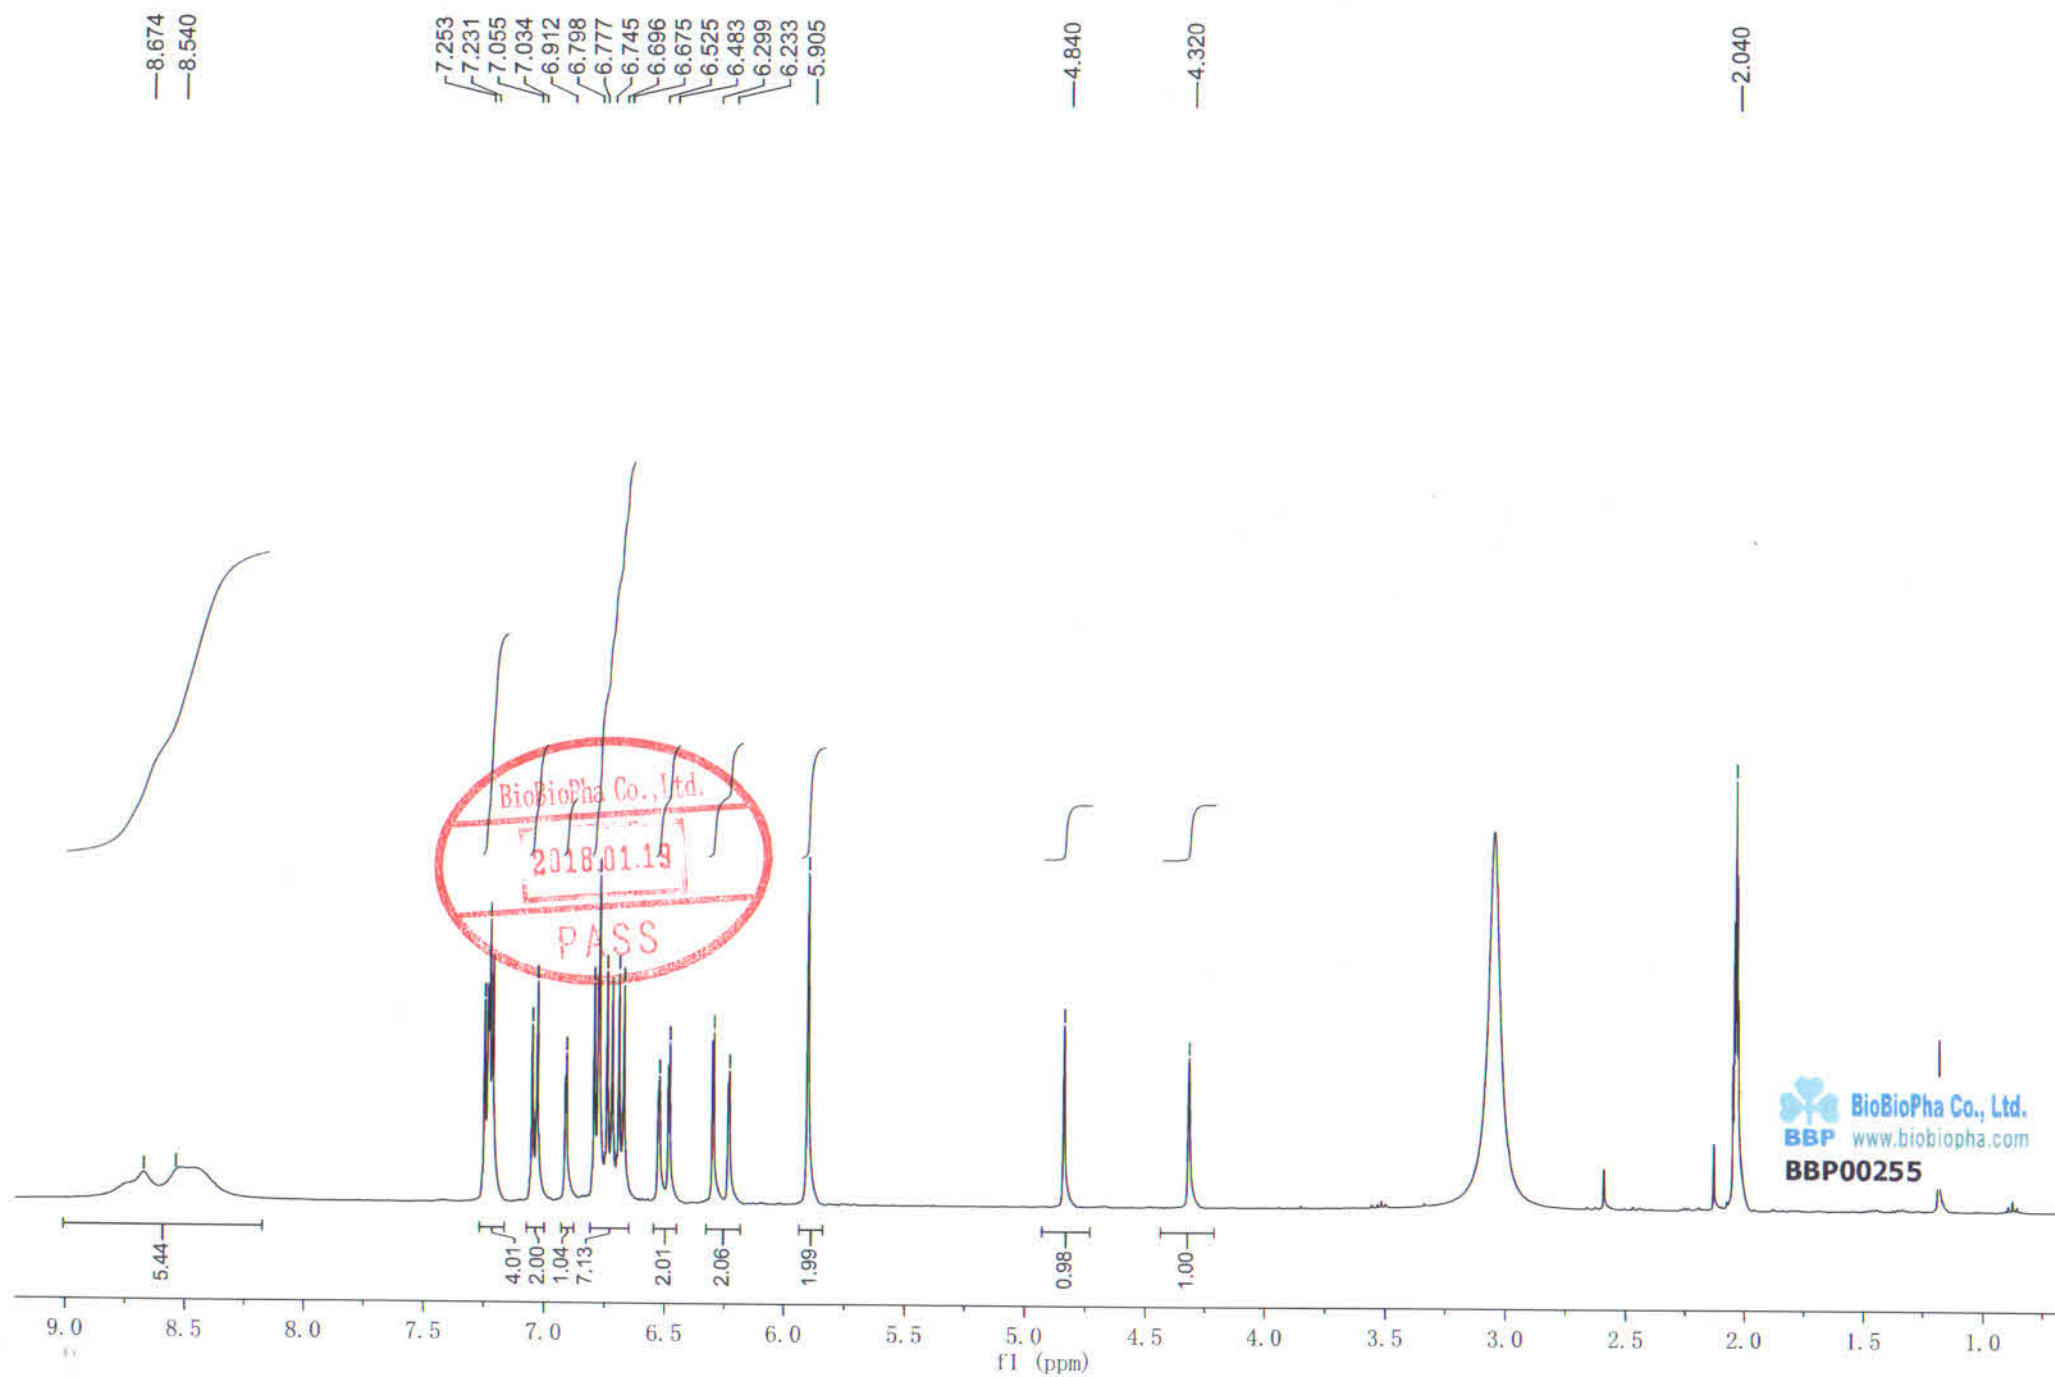

Supplement: s1 [file s1]
